# Supplementary material
Source: HighWire-hosted journal article supplement (https://www.cmajopen.ca/highwire/filestream/81203/field_highwire_adjunct_files/0/2017-0128-1-at.pdf)
Supplement: 2017-0128-1-at.pdf [file 2017-0128-1-at.pdf]

**Appendix 1 (as supplied by the authors):** Investigators of the Preterm Birth Network

Haim Abenhaim, MD, Jewish General Hospital, Montréal, Québec; Jehier Afifi, MBBCh, MSc, IWK Health Centre, Halifax, Nova Scotia; Ruben Alvaro, MD, St. Boniface General Hospital, Winnipeg, Manitoba; James Andrews, MD, Saint John Regional Hospital, Saint John, New Brunswick; Anthony Armson, MD, IWK Health Centre, Halifax, Nova Scotia; Francois Audibert, MD, Hôpital Sainte-Justine, Montréal, Québec; Khalid Aziz, MBBS, MA, Med, Royal Alexandra Hospital, Edmonton, Alberta; Marilyn Ballantyne, RN, PhD, Holland Bloorview Kids Rehabilitation Hospital, Toronto, Ontario; Jon Barrett, MD, Sunnybrook Health Sciences Center, Sunnybrook Research Institute, Toronto, Ontario, Canada; Marc Beltempo, MD, McGill University Health Centre, Montréal, Québec; Anick Berard, PhD, Université de Montréal, Montréal, Québec; Valerie Bertelle, MD, Centre Hospitalier Universitaire de Sherbrooke, Sherbrooke, Québec; Lucie Blais, PhD, Université de Montréal, Montréal, Québec; Alan Bocking, MD, Mount Sinai Hospital, Toronto, Ontario; Jaya Bodani, MD, Regina General Hospital, Regina, Saskatchewan; ; Jason Burrows, MD, Surrey Memorial Hospital, Surrey, British Columbia; Kimberly Butt, MD, Dr. Everett Chalmers Hospital, Fredericton, New Brunswick; Roderick Canning, MD, Moncton Hospital, Moncton, New Brunswick; George Carson, MD, Regina General Hospital, Regina, Saskatchewan; Nils Chaillet, PhD, Université Laval, Québec City, Québec, Canada; Sue Chandra, MD, Royal Alexandra Hospital, Edmonton, Alberta; Paige Church, MD, Sunnybrook Health Sciences Centre, Toronto, Ontario; Zenon Cieslak, MD, Royal Columbian Hospital, New Westminster, British Columbia; Kevin Coughlin, MD, London, Ontario; Joan Crane, MD, Janeway Children's Health and Rehabilitation Centre, St. John's, Newfoundland; Dianne Creighton, PhD, Alberta Children's Hospital, Calgary,

Alberta; Orlando Da Silva, MD, MSc, London Health Sciences Centre, London, Ontario; Thierry Daboval, MD, Children's Hospital of Eastern Ontario, Ottawa, Ontario; Leanne Dahlgren, MD, Children's & Women's Health Centre of BC, Vancouver, British Columbia; Sibasis Daspal, MD, Royal University Hospital, Saskatoon, Saskatchewan; Cecilia de Cabo, MD, University of Manitoba, Winnipeg, Manitoba; Akhil Deshpandey, MBBS, MRCPI, Janeway Children's Health and Rehabilitation Centre, St. John's, Newfoundland; Kimberly Dow, MD, Kingston General Hospital, Kingston, Ontario; Christine Drolet, MD, Centre Hospitalier Universitaire de Québec, Sainte Foy, Québec; Michael Dunn, MD, Sunnybrook Health Sciences Centre, Toronto, Ontario; Salhab el Helou, MD, Hamilton Health Sciences Centre, Hamilton, Ontario; Darine El-Chaar, MD, Children's Hospital of Eastern Ontario, Ottawa, Ontario; Walid El-Naggar, MD, IWK Health Centre, Halifax, Nova Scotia; Carlos Fajardo, MD, Alberta Children's Hospital, Calgary, Alberta; Jonathan Foster, Canadian Premature Babies Foundation, Toronto, Ontario, Canada; Robert Gagnon, MD, McGill University Health Centre, Montréal, Québec; Rob Gratton, MD, London Health Sciences Centre, London, Ontario; Victor Han, MD, University of Western Ontario, London, Ontario; Adele Harrison, MD, MBChB, Victoria General Hospital, Victoria, British Columbia; Shabih Hasan, MD, University of Calgary, Calgary, Alberta; Michael Helewa, MD, St. Boniface General Hospital, Winnipeg, Manitoba; Matthew Hicks, MD, PhD, University of Alberta, Edmonton, Alberta; KS Joseph, MD, PhD, University of British Columbia, Vancouver, British Columbia; Andrzej Kajetanowicz, MD, Cape Breton Regional Hospital, Sydney, Nova Scotia; Zarin Kalapesi, MD, Regina General Hospital, Regina, Saskatchewan; May Khairy, MD, McGill University, Montréal, Québec; Thierry Lacaze-Masmonteil, MD, Alberta Health Services and the Cumming School of Medicine, University of Calgary, Calgary, Alberta; Kyong-Soon Lee, MD, MSc, Hospital for Sick Children, Toronto, Ontario; Brigitte

Lemyre, MD, Children's Hospital of Eastern Ontario and Ottawa General Hospital, Ottawa, Ontario; Abhay Lodha, MD, Foothills Medical Centre, Calgary, Alberta;

Deepak Louis, MD, University of Manitoba, Winnipeg, Manitoba; Thuy Mai Luu, MD, MSc, University of Montréal, Montréal, Québec; Linh Ly, MD, Hospital for Sick Children, Toronto, Ontario; Annette Majnemer, PhD, MSc McGill University, Montréal, Québec; Hala Makary, MD, Dr. Everett Chalmers Hospital, Fredericton, New Brunswick; Isabelle Marc, MD, Université Laval, Québec City, Québec; Edith Masse, MD, Centre Hospitalier Universitaire de Sherbrooke, Sherbrooke, Québec; Sarah D McDonald, MD, MSc, McMaster University, Hamilton, Ontario; Doug McMillan, MD, IWK Health Centre, Halifax, Nova Scotia; Nir Melamed, MD, Sunnybrook Health Sciences Centre, Toronto, Ontario; Amy Metcalfe, PhD, Foothills Medical Centre, University of Calgary, Calgary, Alberta; Diane Moddemann, MD, Med, University of Manitoba, Winnipeg, Manitoba; Luis Monterrosa, MD, Saint John Regional Hospital, Saint John, New Brunswick; Michelle Morais, MD, Hamilton Health Sciences Centre, Hamilton, Ontario; Amit Mukerji, MD, Hamilton Health Sciences Centre, Hamilton, Ontario; William Mundle, MD, Windsor Regional Hospital, Windsor, Ontario; Lynn Murphy, MD, Moncton Hospital, Moncton, New Brunswick; Kellie Murphy, MD, Mount Sinai Hospital, Toronto, Ontario; Anne-Monique Nuyt, MD, Hôpital Sainte-Justine, Montréal, Québec; Chuks Nwaesei, MD, Windsor Regional Hospital, Windsor, Ontario; Karel O'Brien, MD, Mount Sinai Hospital, Toronto, Ontario; Martin Offringa, MD, Hospital for Sick Children, Toronto, Ontario; Cecil Ojah, MBBS, Saint John Regional Hospital, Saint John, New Brunswick; Annie Ouellet, MD, Centre Hospitalier Universitaire de Sherbrooke, Sherbrooke, Québec; Jean-Charles Pasquier, MD, PhD, Université de Sherbrooke, Sherbrooke, Québec; Petros Pechlivanoglou, PhD, The Hospital for Sick Children, Toronto, Ontario, Canada; Ermelinda Pelausa, MD, Jewish

General Hospital, Montréal, Québec; Bruno Piedboeuf, MD, Université Laval, Québec City, Québec; Elodie Portales-Casamar, PhD, BC Children's Hospital, Vancouver, Ontario; Shahirose Premji, PhD, University of Calgary, Calgary, Alberta; Pramod Puligandla, MD, MSc, McGill University, Montréal, Québec; Eleanor Pullenayegum, PhD, Hospital for Sick Children, Toronto, Ontario; Amber Reichert, MD, Glenrose Rehabilitation Hospital, Edmonton, Alberta; Kate Robson, Canadian Premature Babies Foundation, Toronto, Ontario, Canada; Carol Schneider, MD, Winnipeg Health Sciences Centre, Winnipeg, Manitoba; Mary Seshia, MBChB, Winnipeg Health Sciences Centre, Winnipeg, Manitoba; Prakesh S Shah, MD, MSc, Mount Sinai Hospital, Toronto, Ontario; Vibhuti Shah, MD, MSc, Mount Sinai Hospital, Toronto, Ontario; Rebecca Sherlock, MD, Surrey Memorial Hospital, Surrey, British Columbia; Sandesh Shivananda, MD, MSc, University of British Columbia, Vancouver, British Columbia; Nalini Singhal, MD, Alberta Children's Hospital, Calgary, Alberta; Erik Skarsgard, MD, BC Children's Hospital, Vancouver, British Columbia; Amanda Skoll, MD, BC Women's Hospital and Health Center, Vancouver, British Columbia; Graeme Smith, MD, Kingston General Hospital, Kingston, Ontario; Anne Synnes, MDCM, MHSC, University of British Columbia, Vancouver, British Columbia; Katherine Thériault, MD, Centre Hospitalier Universitaire de Québec, Sainte Foy, Québec; Joseph Ting, MD, BC Women's Hospital and Health Centre, Vancouver, British Columbia; Suzanne Tough, PhD, University of Calgary, Calgary, Alberta; Jennifer Toye, MD, Royal Alexandra Hospital, Edmonton, Alberta; Jagdeep Ubhi, MD, Royal Columbian Hospital, New Westminster, British Columbia; Michael Vincer, MD, IWK Health Centre, Halifax, Nova Scotia; Wendy Whittle, MD, PhD, Mount Sinai Hospital, Toronto, Ontario; Hilary Whyte, MD, Hospital for Sick Children, Toronto, Ontario; Doug Wilson, MD, Foothills Medical Centre, Calgary, Alberta; Stephen Wood, MD, Foothills Medical Centre, Calgary, Alberta; Philip Ye,

MSc, Mount Sinai Hospital, Toronto, Ontario; Wendy Yee, MD, Foothills Medical Centre, Calgary, Alberta; Jill Zwicker, PhD, University of British Columbia, Vancouver, British Columbia.
